# Supplementary material
Source: publisher figshare collection journal article supplement (https://brill.figshare.com/ndownloader/files/23146295)
Supplement: Supplementary file 1 [file 23146295]

Performance of visual vs. software-assisted photo-identification in  
mark-recapture studies: a case study examining different life stages  
of the Pacific Horned Frog (*Ceratophrys stolzmanni*)

Cecilia Bardier<sup>1,2,\*</sup>, Diana Székely<sup>3,4,5</sup>, Guilherme Augusto-Alves<sup>6,7</sup>, Nicolás Matínez-  
Latorraca<sup>8</sup>, Benedikt R. Schmidt<sup>1,9</sup>, Sam S. Cruickshank<sup>10</sup>

1 - Department of Evolutionary Biology and Environmental Studies, University of Zurich, Zurich 8057,  
Switzerland

2 - Instituto de Investigaciones Biológicas Clemente Estable, Montevideo 11600, Uruguay

3 - EcoSs Lab, Departamento de Ciencias Biológicas, Universidad Técnica Particular de Loja, Loja 07 370  
1444, Ecuador

4 - Ovidius University Constanța, Faculty of Natural and Agricultural Sciences, Constanța 900470, Romania

5 - Laboratory of Ecology and Conservation of Amphibians, Freshwater and Oceanic science Unit of  
reSearch (FOCUS), University of Liège, Liège 4020, Belgium

6 - Laboratório de História Natural de Anfíbios Brasileiros (LaHNAB), Departamento de Biologia Animal,  
Instituto de Biologia, Unicamp, Campinas, São Paulo 13083-862, Brazil

7 - Programa de Pós-Graduação em Ecologia, Instituto de Biologia, Unicamp, Campinas, Brazil

8 - Licenciatura en Ingeniería Biológica, CENUR-LN, Facultad de Ingeniería, Universidad de la  
República, Montevideo 11300, Uruguay

9 - Info Fauna Karch, UniMail, Bâtiment G, Bellevaux 51, 2000 Neuchâtel, Switzerland

10 - Swiss Federal Research Institute WSL, Zürcherstrasse 111, 8903 Birmensdorf, Switzerland

\*Corresponding author; e-mail: [ceciliabardier@gmail.com](mailto:ceciliabardier@gmail.com)

## Supplementary material

**Table S1.** Counts of *Ceratophrys stolzmanni* individuals per night.

| Date      | <i>n</i> of toads |
|-----------|-------------------|
| 21/1/2016 | 10                |
| 22/1/2016 | 2                 |
| 23/1/2016 | 1                 |
| 24/1/2016 | 7                 |
| 25/1/2016 | 3                 |
| 26/1/2016 | 2                 |
| 28/1/2016 | 3                 |
| 29/1/2016 | 19                |
| 30/1/2016 | 15                |
| 31/1/2016 | 12                |
| 1/2/2016  | 15                |
| 2/2/2016  | 10                |
| 4/2/2016  | 4                 |
| 5/2/2016  | 20                |
| 6/2/2016  | 21                |
| 7/2/2016  | 20                |
| 11/2/2016 | 11                |

|           |    |
|-----------|----|
| 12/2/2016 | 6  |
| 13/2/2016 | 19 |
| 14/2/2016 | 18 |
| 15/2/2016 | 11 |
| 17/2/2016 | 4  |
| 19/2/2016 | 1  |
| 20/2/2016 | 4  |
| 21/2/2016 | 13 |
| 22/2/2016 | 2  |
| 23/2/2016 | 2  |
| 24/2/2016 | 9  |
| 26/2/2016 | 38 |
| 29/2/2016 | 41 |
| 1/3/2016  | 35 |
| 3/3/2016  | 28 |
| 5/3/2016  | 18 |
| 7/3/2016  | 6  |
| 8/3/2016  | 8  |
| 9/3/2016  | 14 |
| 10/3/2016 | 14 |
| 11/3/2016 | 25 |
| 12/3/2016 | 13 |

Total 504

**Text S1.** Calculation of FAR and FRR for photo-ID techniques.

### **Basic formulas**

Following Morrison et al. (2011) and Cruickshank and Schmidt (2017), the basic formulas are:

$$FAR = \frac{N(\text{false matches})}{N(\text{non - matching comparisons})}$$

$$FRR = \frac{N(\text{falsely - rejected matches})}{N(\text{truly matching comparisons})}$$

*N(false matches)*: is the number of matches made between images which were not true matching pairs.

*N(falsely-rejected matches)*: is the number of matches between images which were true matching pairs but were not identified as such.

*N(truly matching comparisons)*: actual number of true matches among all the comparisons made.

$N(\text{non-matching comparisons})$ : total number of comparisons which are not true matches, defined as the total number of possible comparisons:  $n!/(2*(n-2)!)$  minus  $N(\text{truly matching comparisons})$ , where  $n$  is the total number of images to be compared.

### Error calculation for the first step of visual recognition

For this step, we grouped the database of images into females ( $n = 228$ ), males ( $n = 233$ ) and juveniles ( $n = 22$ ). Thus, the elements for the error calculation are:

|                                              | Females                   | Males                     | Juveniles             |
|----------------------------------------------|---------------------------|---------------------------|-----------------------|
| STEP1 $N(\text{false matches})$              | 0                         | 0                         | 0                     |
| STEP1 $N(\text{falsely-rejected matches})$   | 34                        | 32                        | 0                     |
| STEP1 $N(\text{truly matching comparisons})$ | 68                        | 64                        | 3                     |
| STEP1 number of possible comparisons         | $228!/(2*(228-2)!)=25878$ | $233!/(2*(233-2)!)=27028$ | $22!/(2*(22-2)!)=231$ |
| STEP1 $N(\text{non-matching comparisons})$   | $25878-68=25810$          | $27028-64=26964$          | $231-3=228$           |

The formulas for step 1 are:

$$FAR_{STEP1} = \frac{0}{25810 + 26964 + 228} = 0$$

$$FRR_{STEP1} = \frac{34 + 32 + 0}{68 + 64 + 3} = \frac{66}{135} = 0.49$$

## Error calculation for the second step of visual recognition

This visual matching approach in the first step implicitly assumed that all individuals were assigned to the correct group with no error. This implies that no matches were missed due to different images of an individual being assigned to the wrong group. However, we discovered from the analysis with WILDID/APHIS that this assumption was not met; indeed the photo-ID analysis highlighted that in at least 30 cases photographs were assigned to the wrong group in this visual assessment process. For this reason, we run the second step one-by-one paired comparisons among images. Thus, the elements for the error calculation of the second step are:

|                                            | Total database             |
|--------------------------------------------|----------------------------|
| STEP2 <i>N(false matches)</i>              | 3                          |
| STEP2 <i>N(falsely-rejected matches)</i>   | 5                          |
| STEP2 <i>N(truly matching comparisons)</i> | 150                        |
| STEP2 number of possible comparisons       | $483!/(2*(483-2)!)=116403$ |
| STEP2 <i>N(non-matching comparisons)</i>   | $116403-150=116253$        |

The formulas for step 2 are:

$$FAR_{STEP2} = \frac{3}{116253} = 2.58E - 05$$

$$FRR_{STEP2} = \frac{5}{150} = 0.03$$

### **Error calculation for the two-step process of visual recognition**

For our study, a false acceptance occurred IF a wrong match was made in step 1 OR step 2, but a false rejection occurred IF, on the other hand, the match was missed in step 1 AND step 2. Thus, the formulas for both steps combined are:

$$FAR\ visual = 0 + \frac{3}{116253} = 2.58E - 05$$

$$FRR\ visual = \frac{66}{135} * \frac{5}{150} = 0.02$$

### **Error calculation for the software-assisted recognition using Wild-ID and APHIS**

Calculation of error rates for Wild-ID and APHIS is straightforward because they are one-by-one paired comparisons through software. Thus, the elements for the error calculation of these techniques are:

|                                      | Wild-ID                    | APHIS                      |
|--------------------------------------|----------------------------|----------------------------|
| <i>N(false matches)</i>              | 0                          | 0                          |
| <i>N(falsely-rejected matches)</i>   | 7                          | 11                         |
| <i>N(truly matching comparisons)</i> | 150                        | 150                        |
| number of possible comparisons       | $483!/(2*(483-2)!)=116403$ | $483!/(2*(483-2)!)=116403$ |
| <i>N(non-matching comparisons)</i>   | $116403-150=116253$        | $116403-150=116253$        |



The formulas for Wild-ID are:

$$FAR_{Wild-ID} = \frac{0}{116253} = 0$$

$$FRR_{Wild-ID} = \frac{7}{150} = 0.05$$

The formulas for APHIS are:

$$FAR_{APHIS} = \frac{0}{116253} = 0$$

$$FRR_{APHIS} = \frac{11}{150} = 0.07$$

Methods S2.b. Details of the sample for the estimates of the applicability of photo-ID to froglets.

The sample was analyzed using Wild-ID to determine the similarity scores between froglets and older stages through forced image matches: accepting the top ranked non-recapture image proposed by the software. Although the sample had to contain equal number of

images of froglets and older stages (to detect bias in matching between groups), we had to add 20 images more from older stages. This is because of the own working protocol of Wild-ID: it forces the first 20 comparisons only between the first 20 images in the database, providing too few options to choose for matching pairs. Indeed, the first match can only be done between the first two images in the database; the second match can only be done between the first three images in the database, and so on until the match number 20. Thus we added 20 images of older stages at the beginning of the database, discarded matching pairs between these first 20 images, and accepted all the matches after image 20. This is why the sample ( $n = 62$ ) contained 20 images of older stages in the beginning, followed by a random mix of 21 images of recently metamorphosed froglets plus 21 images of older stages. Matches were only accepted between these 42 randomly ordered last images.
